# Supplementary material for: A Comparison of Cell-Cell Interaction Prediction Tools Based on scRNA-seq Data
Source: MDPI journal article supplement (doi:10.3390/biom13081211), 2023-08-02
Supplement: s1 [file s1]

**Supplementary Table S1. Reviewed CCI prediction tools**

| Tool                  | Implementation | Method                                                                                                                                       | Database                                                                                          | Output                                                                           | Reference                                                                         | Qualified/<br>Reason for<br>exclusion |
|-----------------------|----------------|----------------------------------------------------------------------------------------------------------------------------------------------|---------------------------------------------------------------------------------------------------|----------------------------------------------------------------------------------|-----------------------------------------------------------------------------------|---------------------------------------|
| CellChat              | R              | CCI probabilities are calculated using the law of mass action, based on average expression of ligands/receptors by cell groups and cofactors | Curated ligand/receptor database including subunits and cofactors                                 | CellChat object containing all the inferred CCIs with their probabilities        | Jin et al. [1]                                                                    | Qualified                             |
| iTALK                 | R              | CCIs are identified by differentially expressed ligands/receptors between clusters                                                           | Manually curated ligand/receptor database                                                         | All CCIs with their mean ligand/receptor expression                              | Wang et al. [2]                                                                   | Qualified                             |
| SingleCellSignal<br>R | R              | LRscore, a regularized score, is utilized to assess the confidence in predicted ligand-receptor interactions by controlling false positives  | Curated ligand/receptor database with existing sources and manual additions                       | All CCIs with their regularized LRscore                                          | Cabello-Aguilar et al. [3]                                                        | Qualified                             |
| CCInx                 | R              | CCIs are predicted using ligand/receptor expression magnitude to rank nodes                                                                  | Bader lab's ligand/receptor database                                                              | Node and edge list of all CCIs                                                   | <a href="https://github.com/BaderLab/CCInx">https://github.com/BaderLab/CCInx</a> | Qualified                             |
| scMLnet               | R              | Fisher's exact test and correlation                                                                                                          | Curated ligand/receptor/TF/target database with prior studies and databases                       | Ligand-receptor, receptor-TF and TF-target interactions                          | Cheng et al. [4]                                                                  | Qualified                             |
| CellPhoneDB           | Python         | CCIs are enriched by empirical shuffling and statistical test                                                                                | Curated ligand/receptor database (including complex information) with prior studies and databases | Table with information of ligand-receptor pairs by cell pairs, and their p-value | Efremova et al. [5]                                                               | Qualified                             |
| NATMI                 | Python         | Edge weights of CCIs are calculated by normalized expression level of ligands/receptors                                                      | connectomeDB2020 (a database of manually curated ligand-receptor pairs with literature support)   | Table of ligand-receptor pairs, their expression level and edge weights          | Hou et al. [6]                                                                    | Qualified                             |
| LIANA                 | R              | Robust Rank Aggregation for outputs from different methods                                                                                   | 16 CCI inference resources                                                                        | List containing CCIs predicted with                                              | Dimitrov et al. [7]                                                               | Qualified                             |

|            |              |                                                                                           |                                                                                                        |                                                                                  |                                                                                         |                                                          |
|------------|--------------|-------------------------------------------------------------------------------------------|--------------------------------------------------------------------------------------------------------|----------------------------------------------------------------------------------|-----------------------------------------------------------------------------------------|----------------------------------------------------------|
|            |              |                                                                                           |                                                                                                        | different tools and resources                                                    |                                                                                         |                                                          |
| NicheNet   | R            | CCIs are inferred based on gene expression and a ligand-target regulatory potential model | Built by integrating prior knowledge on ligand-to-target signaling paths (collected from 57 databases) | Table of ligand-receptor pairs and their interaction score                       | Browaeys et al. [8]                                                                     | Samples of control group are required                    |
| scTensor   | R            | CCIs are inferred with tensor decomposition                                               | Curated database (LRBase.XXX.eg.db)                                                                    | HTML files with ligand-receptor pattern interactions                             | Tsuyuzaki et al. [9]                                                                    | Output type is not source-target/ligand-receptor pattern |
| cell2cell  | Python       | CCIs are predicted by expression of ligands and receptors and their Bray-Curtis scores    | Curated ligand-receptor database                                                                       | Table with information of ligand-receptor pairs by cell pairs, and their p-value | Armingol et al. [10]                                                                    | Failed to install                                        |
| PyMINer    | Python       | CCIs are identified by differentially expressed genes or significantly enriched genes     | gProfiler tool (Reimand et al., 2016) and StringDB (Szkarczyk et al., 2015)                            | Table of paracrine/autocrine interactions                                        | Tyler et al. [11]                                                                       | Unsolved error                                           |
| SoptSC     | R and MATLAB | Signaling probabilities between sender and receptor cells are calculated                  | Not provided                                                                                           | Table of cell-cell and cluster-cluster interaction probabilities                 | Wang et al. [12]                                                                        | No database provided                                     |
| CellTalker | R            | CCIs are detected by differentially expressed genes in each cluster                       | Database from Ramilowski et al. (Nature Comms, 2015)                                                   | Upregulated and downregulated interactions between clusters                      | <a href="https://github.com/ar-c85/celltalker">https://github.com/ar-c85/celltalker</a> | Samples of control group are required                    |
| CytoTalk   | R            | Prize-collecting Steiner tree algorithm                                                   | Curated database of 1942 manually annotated ligand-receptor interactions                               | De novo construction of signaling networks between cell types                    | Hu et al. [13]                                                                          | Dependency installation issues                           |
| CellCall   | R            | Calculated by the expression value of ligands and receptors                               | KEGG pathway                                                                                           | S4 object containing a ligand-receptor score between cell types                  | Zhang et al. [14]                                                                       | Failed to install                                        |
| SpaOTsc    | Python       | Structured and unbalanced optimal transport to recover interactions                       | Curated ligand-receptor database (Ramilowski et al.)                                                   | Table of ligand-receptor and their probabilities                                 | Cang et al. [15]                                                                        | Spatial data is required                                 |

## References

1. Jin S, Guerrero-Juarez CF, Zhang L, Chang I, Ramos R, Kuan CH, et al. Inference and analysis of cell-cell communication using cellchat. *Nature communications* **2021**, *12*, 1088
2. Wang Y, Wang R, Zhang S, Song S, Jiang C, Han G, et al. iTalk: An R package to characterize and illustrate intercellular communication. *bioRxiv* **2019**, 507871
3. Cabello-Aguilar S, Alame M, Kon-Sun-Tack F, Fau C, Lacroix M, Colinge J. SingleCellSignalR: Inference of intercellular networks from single-cell transcriptomics. *Nucleic acids research* **2020**, *48*, e55
4. Cheng J, Zhang J, Wu Z, Sun X. Inferring microenvironmental regulation of gene expression from single-cell RNA sequencing data using scmlnet with an application to covid-19. *Briefings in bioinformatics* **2021**, *22*, 988-1005
5. Efremova M, Vento-Tormo M, Teichmann SA, Vento-Tormo R, Hou R, Denisenko E, et al. CellphoneDB: Inferring cell-cell communication from combined expression of multi-subunit ligand-receptor complexes. *Nature protocols* **2020**, *15*, 1484-1506
6. Hou R, Denisenko E, Ong HT, Ramilowski JA, Forrest ARR. Predicting cell-to-cell communication networks using NATMI. *Nature communications* **2020**, *11*, 5011
7. Dimitrov D, Türei D, Garrido-Rodriguez M, et al. Comparison of methods and resources for cell-cell communication inference from single-cell RNA-Seq data. *Nat Commun* **2022**, *13*, 3224
8. Browaeys R, Saelens W, Saeys Y, Tyler SR, Rotti PG, Sun X, et al. NicheNet: Modeling intercellular communication by linking ligands to target genes. *Nature methods* **2020**, *17*, 159-162
9. Tsuyuzaki K, Ishii M, Nikaido I. Uncovering hypergraphs of cell-cell interaction from single cell RNA-sequencing data. *bioRxiv* **2019**, 566182
10. Armingol E, Ghaddar A, Joshi CJ, Baghdassarian H, Shamie I, Chan J, et al. Inferring a spatial code of cell-cell interactions across a whole animal body. *PLoS Comput Biol* **2022**, *18*, e1010715
11. Tyler SR, Rotti PG, Sun X, Yi Y, Xie W, Winter MC, et al. PyMiner finds gene and autocrine-paracrine networks from human islet scRNA-seq. *Cell reports* **2019**, *26*, 1951-1964, e1958
12. Wang S, Karikomi M, MacLean AL, Nie Q. Cell lineage and communication network inference via optimization for single-cell transcriptomics. *Nucleic acids research* **2019**, *47*, e66
13. Hu Y, Peng T, Gao L, Tan K. CytoTalk: De novo construction of signal transduction networks using single-cell transcriptomic data. *Science Advances* **2021**, *7*, eabf1356.
14. Zhang Y, Liu T, Hu X, Wang M, Wang J, Zou B, Tan P, Cui T, Dou Y, Ning L, Huang Y, Rao S, Wang D, Zhao X. CellCall: integrating paired ligand-receptor and transcription factor activities for cell-cell communication. *Nucleic Acids Res* **2021**, *49*, 8520-853
15. Cang Z, Nie Q. Inferring spatial and signaling relationships between cells from single cell transcriptomic data. *Nature communications* **2020**, *11*, 2084

**Supplementary Table S2. Visualization comparison of reviewed prediction tools**

| Tool              | Network | Circos plot | Heatmap | Bubble plot |
|-------------------|---------|-------------|---------|-------------|
| NicheNet          | Y       | Y           | Y       | Y           |
| NATMI             | Y       | Y           | Y       |             |
| iTALK             | Y       | Y           |         |             |
| scTensor          | Y       |             | Y       |             |
| CellPhoneDB       |         |             | Y       | Y           |
| SoptSC            |         |             | Y       |             |
| scMLnet           | Y       |             |         |             |
| SingleCellSignalR |         | Y           |         |             |
| CCInx             | Y       |             |         |             |
| celltalker        |         | Y           |         |             |
| PyMINer           |         |             |         |             |
| CellChat          |         | Y           | Y       | Y           |
| LIANA             |         | Y           | Y       | Y           |

**Supplementary Table S3. Distribution of experimental cell-cell interactions per disease in CITEdb**

| Disease                               | Source-target model | Source-target-ligand-receptor model |
|---------------------------------------|---------------------|-------------------------------------|
| acute inflammation                    | 5                   | 0                                   |
| acute lymphoblastic leukemia          | 2                   | 0                                   |
| allergic contact dermatitis           | 1                   | 0                                   |
| Alzheimer's disease                   | 2                   | 0                                   |
| Asthma                                | 15                  | 0                                   |
| asthmatic lung                        | 1                   | 0                                   |
| Atherogenesis                         | 3                   | 0                                   |
| atherosclerosis                       | 12                  | 1                                   |
| atherosclerotic plaque                | 10                  | 19                                  |
| autoimmune disease                    | 1                   | 0                                   |
| bone metastatic microenvironment      | 2                   | 2                                   |
| breast cancer                         | 22                  | 21                                  |
| Cancer                                | 9                   | 1                                   |
| cancer progression                    | 3                   | 0                                   |
| carcinogenesis                        | 20                  | 0                                   |
| cardiac disease                       | 1                   | 0                                   |
| cardiac hypertrophy                   | 3                   | 0                                   |
| Cholesteatoma                         | 1                   | 0                                   |
| chronic airway inflammation           | 1                   | 0                                   |
| chronic alcohol abuse                 | 1                   | 0                                   |
| colorectal adenocarcinoma             | 1                   | 0                                   |
| colorectal cancer                     | 1                   | 0                                   |
| COPD                                  | 2                   | 0                                   |
| COVID-19                              | 5                   | 4                                   |
| cystic fibrosis                       | 1                   | 0                                   |
| Diabetes                              | 2                   | 0                                   |
| diabetes mellitus                     | 7                   | 2                                   |
| diabetes mellitus, type 1             | 1                   | 0                                   |
| EBV infection                         | 1                   | 0                                   |
| gastric cancer                        | 3                   | 0                                   |
| gastrointestinal stromal tumors       | 1                   | 0                                   |
| Glioblastoma                          | 1                   | 0                                   |
| glioblastoma microenvironment         | 3                   | 0                                   |
| Glioma                                | 1                   | 0                                   |
| head and neck squamous cell carcinoma | 10                  | 10                                  |
| heart failure                         | 2                   | 1                                   |
| heart injuries                        | 1                   | 0                                   |
| hepatitis C virus (HCV) infection     | 1                   | 0                                   |
| hepatocellular carcinoma              | 4                   | 0                                   |

|                                               |    |    |
|-----------------------------------------------|----|----|
| HIV infection                                 | 2  | 0  |
| human immunodeficiency virus type-1 infection | 2  | 0  |
| Infertility                                   | 1  | 0  |
| influenza, human                              | 3  | 0  |
| intervertebral disc degeneration              | 1  | 0  |
| ischemic injury                               | 3  | 0  |
| kidney disease                                | 3  | 0  |
| Leukemia                                      | 1  | 0  |
| liver cancer                                  | 3  | 0  |
| liver fibrotic                                | 6  | 0  |
| lung adenocarcinoma                           | 3  | 0  |
| lung cancer                                   | 10 | 0  |
| lung injury                                   | 3  | 0  |
| Melanoma                                      | 5  | 3  |
| metastatic melanoma                           | 13 | 13 |
| multiple myeloma                              | 1  | 0  |
| myocardial ischemia?Creperfusion injury       | 2  | 0  |
| nasopharyngeal carcinoma                      | 1  | 0  |
| Neoplasms                                     | 7  | 0  |
| neuroblastoma                                 | 2  | 0  |
| neurodegenerative disease                     | 1  | 0  |
| non-alcoholic fatty liver disease             | 5  | 3  |
| non-small lung cancer                         | 1  | 0  |
| Obesity                                       | 2  | 0  |
| Osteoarthritis                                | 3  | 0  |
| ovarian cancer                                | 1  | 0  |
| pancreatic cancer                             | 1  | 0  |
| periodontal disease                           | 1  | 0  |
| Periodontitis                                 | 9  | 1  |
| pituitary tumor                               | 1  | 0  |
| Plasmodium vivax                              | 5  | 0  |
| primary liver cancer                          | 1  | 0  |
| prostate cancer                               | 2  | 0  |
| Psoriasis                                     | 2  | 0  |
| renal cell carcinoma                          | 1  | 0  |
| retinal disease                               | 1  | 0  |
| rheumatoid arthritis                          | 3  | 5  |
| Schizophrenia                                 | 1  | 0  |
| Silicosis                                     | 4  | 0  |
| squamous cell carcinoma                       | 6  | 4  |
| stomach neoplasms                             | 1  | 0  |
| Thrombosis                                    | 1  | 0  |

---

|                                 |    |   |
|---------------------------------|----|---|
| tumor microenvironment          | 11 | 0 |
| type 2 diabetes                 | 2  | 0 |
| ulcerative colitis inflamed     | 2  | 0 |
| ulcerative colitis non-inflamed | 2  | 0 |
| uterine cellular leiomyosarcoma | 1  | 1 |
| uterus injury                   | 4  | 0 |

---

**Supplementary Table S4. scRNA-seq datasets of IPF used in our study**

| GEO Dataset | Sample Name |
|-------------|-------------|
| GSE122960   | IPF_01      |
|             | IPF_02      |
|             | IPF_03      |
|             | IPF_04      |
| GSE128033   | SC153IPFLOW |
|             | SC154IPFUP  |
|             | SC87IPFLOW  |
|             | SC88IPFUP   |
|             | SC89IPFLOW  |
|             | SC93IPFLOW  |
|             | SC94IPFUP   |
|             | SC95IPFLOW  |
| GSE135893   | TILD001     |
|             | TILD006     |
|             | TILD010     |
|             | TILD015     |
|             | TILD028     |
|             | VUILD53     |
|             | VUILD59     |
|             | VUILD60     |
|             | VUILD61     |
|             | VUILD63     |
|             | VUILD64     |
|             | VUILD65     |
| GSE136831   | 010I        |
|             | 021I        |
|             | 022I        |
|             | 025I        |
|             | 034I        |
|             | 040I        |
|             | 041I        |
|             | 051I        |
|             | 053I        |
|             | 063I        |
|             | 123I        |
|             | 135I        |
|             | 138I        |



---

145I

157I

158I

166I

174I

177I

179I

209I

210I

212I

214I

221I

222I

225I

228I

29I

47I

49I

59I

---

**Supplementary Table S5. Top CCIs predicted by scMLnet from outputs of all samples**

| source-target-ligand-receptor         | Prediction frequency |
|---------------------------------------|----------------------|
| Endothelial-Macrophage-CTGF-ITGB2     | 44                   |
| Endothelial-Macrophage-PLAT-ITGB2     | 42                   |
| Endothelial-Macrophage-CYR61-ITGB2    | 40                   |
| Macrophage-Endothelial-IL1RN-IL1R1    | 39                   |
| Endothelial-Macrophage-VCAM1-ITGB2    | 38                   |
| Endothelial-Macrophage-CTGF-LRP1      | 37                   |
| Endothelial-Macrophage-SERPINE1-PLAUR | 37                   |
| Macrophage-Endothelial-IL1B-IL1R1     | 37                   |
| Endothelial-Macrophage-TFPI-LRP1      | 36                   |
| Endothelial-Monocyte-SERPINE1-PLAUR   | 36                   |
| Fibroblast-Macrophage-C3-ITGB2        | 36                   |
| Endothelial-Macrophage-APP-LRP1       | 35                   |
| Endothelial-Macrophage-PLAT-LRP1      | 35                   |
| Endothelial-Monocyte-CTGF-ITGB2       | 35                   |
| Fibroblast-Macrophage-RARRES2-CCRL2   | 35                   |
| Endothelial-Macrophage-IGF2-IGF2R     | 34                   |
| Endothelial-Monocyte-CYR61-ITGB2      | 33                   |
| Endothelial-Monocyte-PLAT-ITGB2       | 33                   |
| Macrophage-Endothelial-BST1-CAV1      | 33                   |
| Endothelial-Macrophage-F8-LRP1        | 32                   |

**Supplementary Table S6. Top CCIs predicted by NATMI from outputs of all samples**

| source-target-ligand-receptor         | Prediction frequency | Sum of prediction specificity |
|---------------------------------------|----------------------|-------------------------------|
| Tcell-Endothelial-CCL5-ACKR1          | 50                   | 40.99493279                   |
| Endothelial-Endothelial-MMRN2-CLEC14A | 46                   | 38.77105524                   |
| Fibroblast-Fibroblast-COL3A1-DDR2     | 48                   | 36.25142374                   |
| Endothelial-Endothelial-MCAM-MCAM     | 44                   | 34.05091879                   |
| Fibroblast-Fibroblast-COL1A1-DDR2     | 47                   | 32.7013714                    |
| Endothelial-Fibroblast-MMRN2-CD248    | 39                   | 32.17917896                   |
| Endothelial-Macrophage-CCL14-CCR1     | 51                   | 31.92938764                   |
| Fibroblast-Endothelial-SLIT3-ROBO4    | 36                   | 31.760152                     |
| Endothelial-Mast-IL33-IL1RL1          | 46                   | 29.414662                     |
| Fibroblast-Endothelial-COL1A2-CD93    | 52                   | 28.99694094                   |
| Fibroblast-Endothelial-SLIT2-ROBO4    | 32                   | 27.62274994                   |
| Tcell-Macrophage-CCL5-CCR1            | 50                   | 26.89195676                   |
| Fibroblast-Endothelial-COL1A1-CD93    | 52                   | 26.34483125                   |
| Fibroblast-Endothelial-ANGPTL1-TEK    | 28                   | 24.75304148                   |
| Endothelial-Endothelial-MMRN2-CD93    | 47                   | 24.64677342                   |
| Tcell-Tcell-CLEC2D-KLRB1              | 35                   | 24.58061868                   |
| Tcell-Tcell-KLRB1-CLEC2D              | 35                   | 24.58061868                   |
| Fibroblast-Endothelial-SERPING1-SELP  | 43                   | 23.84439683                   |
| Fibroblast-Monocyte-DCN-TLR2          | 48                   | 23.82710366                   |
| AT2-Endothelial-SFTPA2-CD93           | 48                   | 23.76355201                   |
